# Supplementary material
Source: PubMed Central journal article supplement (PMC7484943)
Supplement: NIHMS1622229-supplement-Supp2.pdf [file NIHMS1622229-supplement-Supp2.pdf]

**Table e1.** Descriptive characteristics of participants

| <b>Characteristic</b>                        |        | <b>Included</b><br>n=5855 | <b>Excluded</b><br>n=1517      | <b>Difference:</b><br><i>effect size, p</i> |
|----------------------------------------------|--------|---------------------------|--------------------------------|---------------------------------------------|
| <b>Sex, n (%)</b>                            | Male   | 2635 (45)                 | 787 (52)                       | 0.06 <sup>a</sup>                           |
|                                              | Female | 3220 (55)                 | 730 (48)                       | (<0.001)                                    |
| <b>Highest parental education, n (%)</b>     | 1      | 1158 (20)                 | 242 (22) <sup>n=1118</sup>     | 0.03 <sup>a</sup>                           |
|                                              | 2      | 2479 (42)                 | 496 (44)                       | (0.04)                                      |
|                                              | 3      | 2218 (38)                 | 380 (34)                       |                                             |
| <b>Number of parents, n (%)</b>              | ≤1     | 1081 (18)                 | 298 (20)                       | 0.01 <sup>a</sup>                           |
|                                              | ≥2     | 4774 (82)                 | 1219 (80)                      | (0.29)                                      |
| <b>Number of siblings, n (%)</b>             | 0      | 1042 (18)                 | 199 (13)                       | 0.28 <sup>a</sup>                           |
|                                              | 1      | 2444 (42)                 | 411 (27)                       | (<0.001)                                    |
|                                              | 2      | 1324 (23)                 | 292 (19)                       |                                             |
|                                              | 3      | 553 (9)                   | 140 (9)                        |                                             |
|                                              | ≥4     | 492 (8)                   | 475 (31)                       |                                             |
| <b>zBMI, mean (sd)</b>                       |        | 0.45 (1.26)               | 0.60 (1.28) <sup>n=1486</sup>  | 0.12 <sup>b</sup><br>(<0.001)               |
| <b>HRQoL (T-score), mean (sd)</b>            |        | 50.11 (9.61)              | 49.58 (10.1) <sup>n=1443</sup> | 0.05 <sup>b</sup> (0.06)                    |
| <b>Time use, min/day, compositional mean</b> | Sleep  | 538 <sup>c</sup>          | 536 <sup>n=436</sup>           | 0.00 <sup>d</sup>                           |
|                                              | SED    | 525                       | 526 <sup>n=698</sup>           | (0.28) <sup>e</sup>                         |
|                                              | LPA    | 320                       | 320 <sup>n=698</sup>           |                                             |
|                                              | MVPA   | 57                        | 59 <sup>n=698</sup>            |                                             |

No standard deviations presented for compositional means because univariate variability is irrelevant for compositional data. <sup>a</sup>Cramer's V, <sup>b</sup>Cohen's d, <sup>c</sup>For dispersion, see variation matrices below in Table 2, <sup>d</sup>partial eta squared, <sup>e</sup>daily time use compositions (transformed to isometric log ratio co-ordinates) were compared using Hotelling's T square test (MANOVA). SED = sedentary time. LPA = light physical activity. MVPA = moderate-to-vigorous physical activity. zBMI=Body mass index z-score (World Health Organization). HRQoL = health-related quality of life. Parent education levels are 1= < high school and some high school; 2 = completed high school and some post-secondary (e.g., vocational diploma or certificate); 3 = bachelor degree and post-graduate)

**Table e2.** Variation matrices of daily movement behavior compositions

|                                     | <b>Sleep</b> | <b>SED</b> | <b>LPA</b> | <b>MVPA</b> |
|-------------------------------------|--------------|------------|------------|-------------|
| <b>Included participants n=5855</b> |              |            |            |             |
| <b>Sleep</b>                        | 0            | 0.04       | 0.05       | 0.18        |
| <b>SED</b>                          | 0.04         | 0          | 0.07       | 0.25        |
| <b>LPA</b>                          | 0.05         | 0.07       | 0          | 0.16        |
| <b>MVPA</b>                         | 0.18         | 0.25       | 0.16       | 0           |
| <b>Excluded participants n=1517</b> |              |            |            |             |
| <b>Sleep</b>                        | 0            | 0.04       | 0.05       | 0.18        |
| <b>SED</b>                          | 0.04         | 0          | 0.08       | 0.23        |
| <b>LPA</b>                          | 0.05         | 0.08       | 0          | 0.14        |
| <b>MVPA</b>                         | 0.18         | 0.23       | 0.14       | 0           |

SED = sedentary time. LPA = light physical activity. MVPA = moderate-to-vigorous physical activity

**Table e3.** Included and Excluded Participants by Country

|                  | <b>Included, n (%)</b> | <b>Excluded, n (%)</b> | <b>Total, n</b> |
|------------------|------------------------|------------------------|-----------------|
| <b>Australia</b> | 435 (82)               | 93 (18)                | 528             |
| <b>Brazil</b>    | 435 (74)               | 149 (26)               | 584             |
| <b>Canada</b>    | 500 (88)               | 67 (12)                | 567             |
| <b>China</b>     | 462 (84)               | 90 (16)                | 552             |
| <b>Colombia</b>  | 821 (89)               | 98 (11)                | 919             |
| <b>Finland</b>   | 433 (81)               | 103 (19)               | 536             |
| <b>India</b>     | 526 (85)               | 94 (15)                | 620             |
| <b>Kenya</b>     | 457 (81)               | 106 (19)               | 563             |
| <b>Portugal</b>  | 577 (74)               | 200 (26)               | 777             |
| <b>RSA</b>       | 387 (70)               | 163 (30)               | 550             |
| <b>England</b>   | 376 (72)               | 149 (28)               | 525             |
| <b>USA</b>       | 446 (69)               | 205 (31)               | 651             |

RSA= Republic of South Africa, USA = United States

Chi-squared statistic for difference between included/excluded = 219,  $p < 0.001$ , Cramer's V = 0.17
