# Supplementary material
Source: PubMed Central journal article supplement (PMC7484943)
Supplement: NIHMS1622229-supplement-Supp3.pdf [file NIHMS1622229-supplement-Supp3.pdf]

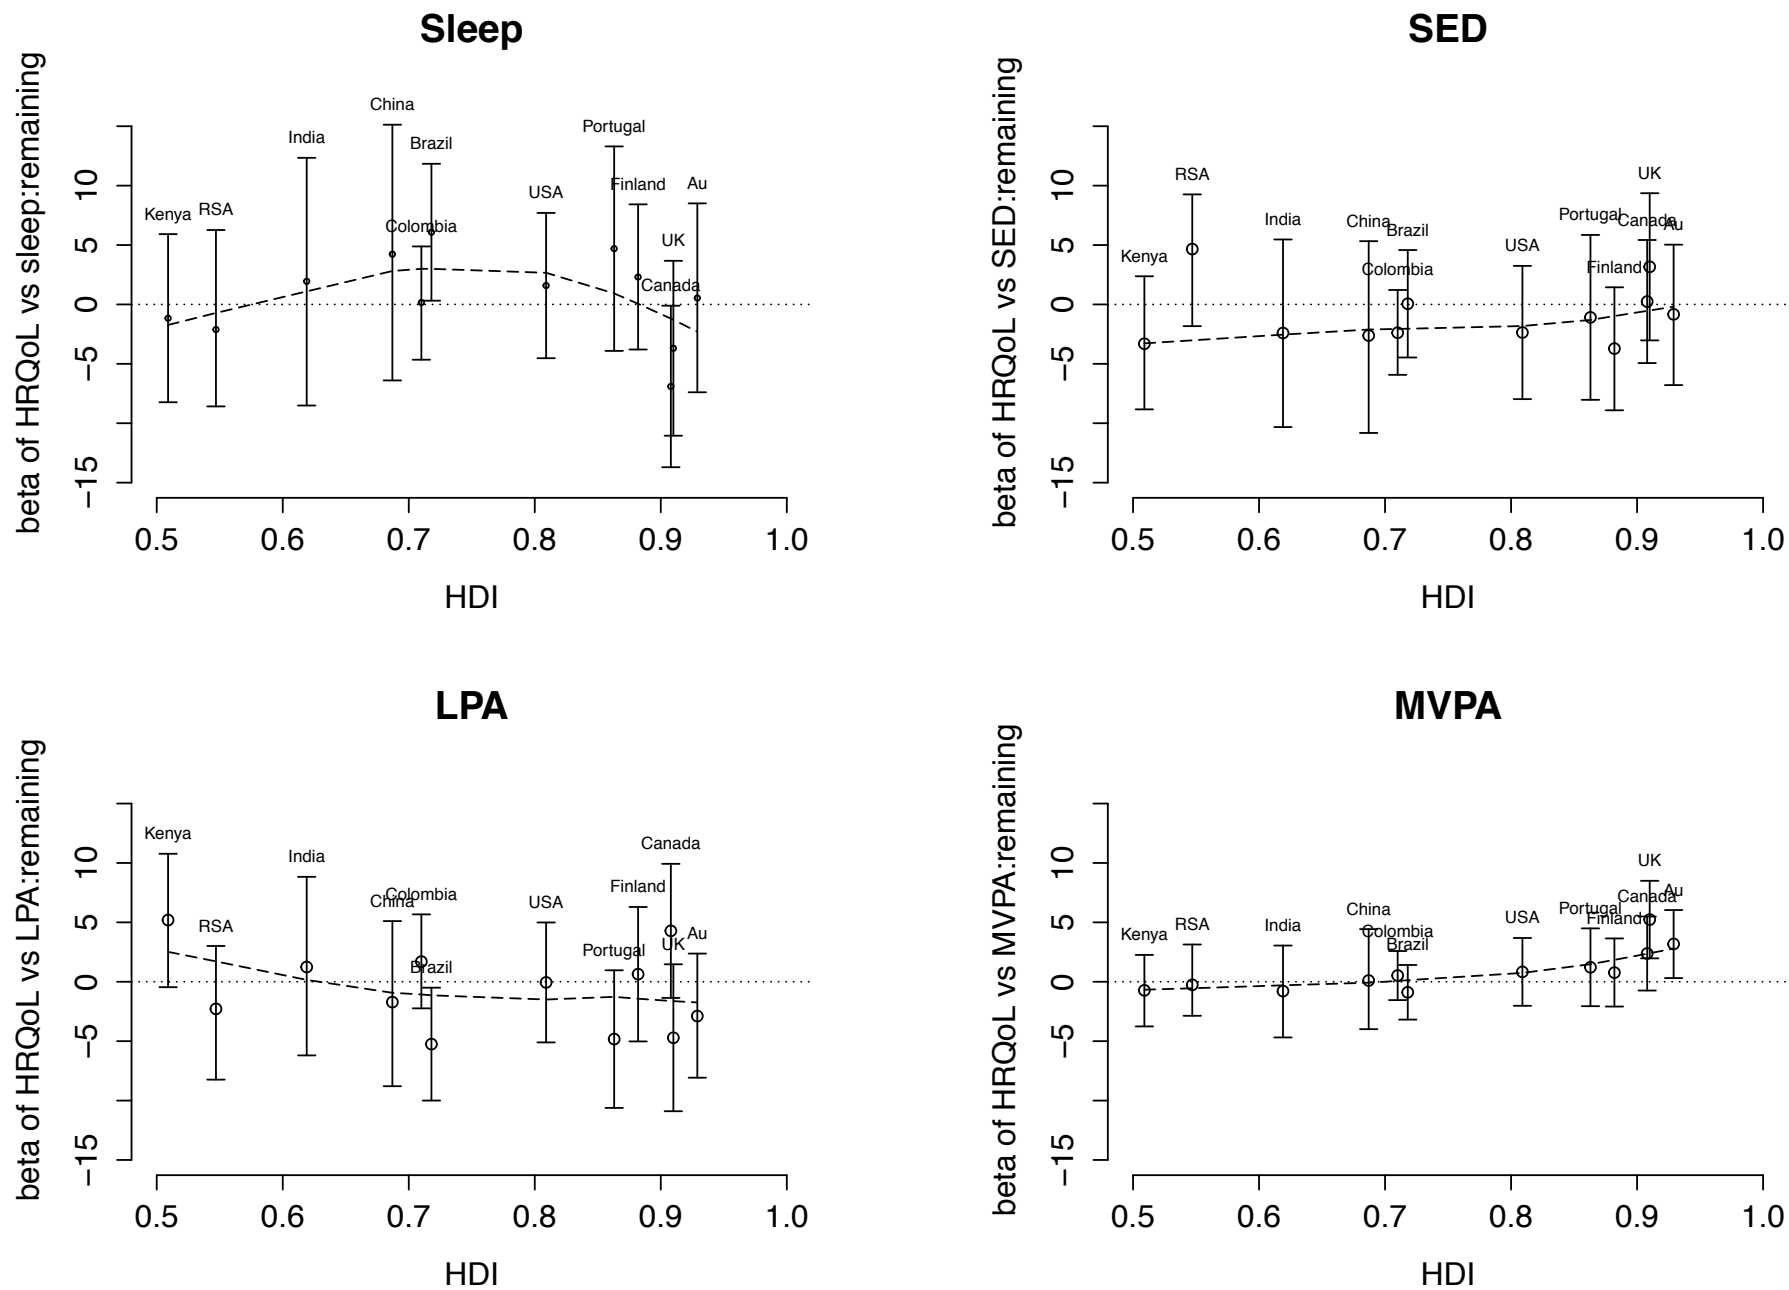

**Figure e1.** The Relationship between Movement Behavior Components (relative to the remaining components) and Health-Related Quality of Life (HRQoL) across Human Development Index (HDI): betas from linear models

MVPA=Moderate-to-vigorous physical activity, SED=sedentary time, LPA=light physical activity, RSA= South Africa, USA=United States, UK=United Kingdom, Au = Australia
