# Supplementary material
Source: PubMed Central journal article supplement (PMC7484943)
Supplement: NIHMS1622229-supplement-Supp4.pdf [file NIHMS1622229-supplement-Supp4.pdf]

**Analyses stratified by HDI: results from log-ratio mixed effect linear regression models**

**Table e4.** Very High HDI: (Australia, United States, Canada, Finland, England and Portugal)

|                                                 | $\hat{\beta}$ | Std. Error | t value  | <i>p</i> |
|-------------------------------------------------|---------------|------------|----------|----------|
| <i>ilr</i> sleep*                               | -0.52         | 1.45       | -0.36    | 0.72     |
| <i>ilr</i> sedentary                            | -0.83         | 1.19       | -0.70    | 0.48     |
| <i>ilr</i> LPA                                  | -0.67         | 1.17       | -0.58    | 0.56     |
| <i>ilr</i> MVPA                                 | 2.03          | 0.63       | 3.20     | 0.001    |
| ANOVA: Type II Wald chi-squared tests           | Chisq         | Df         | <i>p</i> |          |
| <i>ilr</i> coordinates (composition as a whole) | 12.72         | 3          | 0.005    |          |
| Covariates:                                     |               |            |          |          |
| Sex                                             | 0.95          | 1          | 0.33     |          |
| Parental education level                        | 21.41         | 2          | <0.001   |          |
| Number of siblings                              | 4.36          | 4          | 0.36     |          |
| Number of parents                               | 0.28          | 1          | 0.59     |          |
| Child zBMI                                      | 12.93         | 1          | <0.001   |          |

$\hat{\beta}$ , unstandardized regression coefficient; SE, standard error; *ilr*, isometric log ratio of one behavior relative to the geometric mean of the remaining behaviors; LPA, light physical activity; MVPA, moderate-to-vigorous physical activity; zBMI: Body mass index z-score.

\*For example, this *ilr* represents sleep, relative to the geometric mean of sedentary time, LPA and MVPA. Analysis adjusted for potential clustering at school level (school included as a random effect)

**Table e5.** High HDI: Brazil and Colombia

|                                                 | $\hat{\beta}$ | Std. Error | t value  | <i>p</i> |
|-------------------------------------------------|---------------|------------|----------|----------|
| <i>ilr</i> sleep*                               | 2.89          | 1.91       | 1.51     | 0.13     |
| <i>ilr</i> sedentary                            | -1.63         | 1.46       | -1.12    | 0.26     |
| <i>ilr</i> LPA                                  | -1.05         | 1.58       | -0.67    | 0.51     |
| <i>ilr</i> MVPA                                 | -0.21         | 0.80       | -0.26    | 0.80     |
| ANOVA: Type II Wald chi-squared tests           |               |            |          |          |
|                                                 | Chisq         | Df         | <i>p</i> |          |
| <i>ilr</i> coordinates (composition as a whole) | 2.30          | 3          | 0.51     |          |
| Covariates:                                     |               |            |          |          |
| Sex                                             | 2.57          | 1          | 0.11     |          |
| Parental education level                        | 4.71          | 2          | 0.09     |          |
| Number of siblings                              | 11.56         | 4          | 0.02     |          |
| Number of parents                               | 0.44          | 1          | 0.51     |          |
| Child zBMI                                      | 2.39          | 1          | 0.11     |          |

$\hat{\beta}$ , unstandardized regression coefficient; SE, standard error; *ilr*, isometric log ratio of one behavior relative to the geometric mean of the remaining behaviors; LPA, light physical activity; MVPA, moderate-to-vigorous physical activity; zBMI: Body mass index z-score.

\*For example, this *ilr* represents sleep, relative to the geometric mean of sedentary time, LPA and MVPA. Analysis adjusted for potential clustering at school level (school included as a random effect)

**Table e6.** Low-middle HDI (China, South Africa, India and Kenya)

|                                                 | $\hat{\beta}$ | Std. Error | t value  | <i>p</i> |
|-------------------------------------------------|---------------|------------|----------|----------|
| <i>ilr</i> sleep*                               | 1.30          | 2.22       | 0.59     | 0.56     |
| <i>ilr</i> sedentary                            | -0.94         | 1.68       | -0.56    | 0.57     |
| <i>ilr</i> LPA                                  | 0.35          | 1.61       | 0.22     | 0.83     |
| <i>ilr</i> MVPA                                 | -0.70         | 0.88       | -0.80    | 0.42     |
| ANOVA: Type II Wald chi-squared tests           |               |            |          |          |
|                                                 | Chisq         | Df         | <i>p</i> |          |
| <i>ilr</i> coordinates (composition as a whole) | 0.82          | 3          | 0.84     |          |
| Covariates:                                     |               |            |          |          |
| Sex                                             | 1.55          | 1          | 0.21     |          |
| Parental education level                        | 15.05         | 2          | <0.001   |          |
| Number of siblings                              | 10.27         | 4          | 0.04     |          |
| Number of parents                               | 2.38          | 1          | 0.12     |          |
| Child zBMI                                      | 0.17          | 1          | 0.68     |          |

$\hat{\beta}$ , unstandardized regression coefficient; SE, standard error; *ilr*, isometric log ratio of one behavior relative to the geometric mean of the remaining behaviors; LPA, light physical activity; MVPA, moderate-to-vigorous physical activity; zBMI: Body mass index z-score.

\*For example, this *ilr* represents sleep, relative to the geometric mean of sedentary time, LPA and MVPA. Analysis adjusted for potential clustering at school level (school included as a random effect)
