# Supplementary material
Source: PubMed Central journal article supplement (PMC7484943)
Supplement: NIHMS1622229-supplement-supp6.pdf [file NIHMS1622229-supplement-supp6.pdf]

**Table e10.** Children's self report of physical activity context

| <b>Main mode of transport to school in the last week</b> |                |                                 |                       |                           |              |              |
|----------------------------------------------------------|----------------|---------------------------------|-----------------------|---------------------------|--------------|--------------|
|                                                          | <b>Walking</b> | <b>Bicycle,<br/>rollerblade</b> | <b>Bus,<br/>train</b> | <b>Car,<br/>motorbike</b> | <b>Other</b> | <b>Total</b> |
| <b>Very high HDI</b>                                     | 879 (34.5)     | 180 (6.7)                       | 468 (17.3)            | 1168 (43.2)               | 12 (0.5)     | 2707         |
| <b>High HDI</b>                                          | 168 (39)       | 4 (1.0)                         | 148 (34.0)            | 110 (25.3)                | 5 (1.2)      | 435          |
| <b>Low-middle HDI</b>                                    | 514 (28.6)     | 68 (3.8)                        | 503 (28.0)            | 658 (36.7)                | 52 (2.9)     | 1975         |

| <b>Time spent/day walking to school</b> |                   |                 |                  |                        |                    |              |
|-----------------------------------------|-------------------|-----------------|------------------|------------------------|--------------------|--------------|
|                                         | <b>&lt; 5 min</b> | <b>5-15 min</b> | <b>16-30 min</b> | <b>31 min - 1 hour</b> | <b>&gt; 1 hour</b> | <b>Total</b> |
| <b>Very high HDI</b>                    | 252 (28.7)        | 484 (56.1)      | 122 (13.9)       | 16 (1.8)               | 5 (1.0)            | 879          |
| <b>High HDI</b>                         | 47 (28.0)         | 94 (56.0)       | 22 (13.1)        | 5 (3.0)                | 0 (0)              | 168          |
| <b>Low-middle HDI</b>                   | 174 (33.9)        | 203 (39.5)      | 76 (14.8)        | 36 (7.0)               | 25 (4.9)           | 514          |

| <b>Sports team participation in the past 12 months</b> |             |             |              |
|--------------------------------------------------------|-------------|-------------|--------------|
|                                                        | <b>No</b>   | <b>Yes</b>  | <b>Total</b> |
| <b>Very high HDI</b>                                   | 1116 (41.3) | 1584 (58.7) | 2700         |
| <b>High HDI</b>                                        | 186 (42.9)  | 248 (57.1)  | 434          |
| <b>Low-middle HDI</b>                                  | 1051 (58.6) | 742 (41.4)  | 1793         |

| <b>Dance/martial arts participation in the past 12 months</b> |             |            |              |
|---------------------------------------------------------------|-------------|------------|--------------|
|                                                               | <b>No</b>   | <b>Yes</b> | <b>Total</b> |
| <b>Very high HDI</b>                                          | 1814 (67.5) | 874 (32.5) | 2688         |
| <b>High HDI</b>                                               | 344 (79.1)  | 91 (20.9)  | 435          |
| <b>Low-middle HDI</b>                                         | 1349 (75)   | 444 (24.8) | 1793         |

HDI= Human Development Index. Data presented as frequency (%)
